# Supplementary material for: Enhancing Immune Response in Non-Small-Cell Lung Cancer Patients: Impact of the 13-Valent Pneumococcal Conjugate Vaccine
Source: MDPI journal article supplement (doi:10.3390/jcm13051520), 2024-03-06
Supplement: s1 [file s1]

**Table S1.** Analysis of selected parameters of peripheral blood and CRP levels in NSCLC patients and healthy volunteers 7 and 30 days after receiving the PCV13 vaccine in relation to unvaccinated patients

|                                            |               |                | NSCLC group (n=288)             |                                   | Control group (n=69)           |                                  | p-value |         |         |         |
|--------------------------------------------|---------------|----------------|---------------------------------|-----------------------------------|--------------------------------|----------------------------------|---------|---------|---------|---------|
|                                            |               |                | Vaccinated<br>(group 1) (n=151) | Unvaccinated<br>(group 2) (n=137) | Vaccinated<br>(group 3) (n=34) | Unvaccinated<br>(group 4) (n=35) | 1 vs. 2 | 3 vs. 4 | 1 vs. 3 | 2 vs. 4 |
| WBC<br>[10 <sup>3</sup> /mm <sup>3</sup> ] | After 7 days  | Mean±SD        | 9.88±2.78                       | 9.73±2.88                         | 6.75±1.79                      | 6.49±1.45                        | 0.52    | 0.59    | <0.0001 | <0.0001 |
|                                            |               | Median (Range) | 9.5 (3.91-22.07)                | 9.25 (4.39-17.91)                 | 6.2 (4.26-12.9)                | 6.17 (3.64-9.36)                 |         |         |         |         |
|                                            | After 30 days | Mean±SD        | 8.56±3.36                       | 9.28±2.98                         | 6.62±1.79                      | 6.73±1.45                        | 0.31    | 0.63    | <0.0001 | <0.0001 |
|                                            |               | Median (Range) | 8.75 (0.22-22.19)               | 8.77 (3.67-17.46)                 | 6.07 (4.13-12.77)              | 6.44 (3.84-9.56)                 |         |         |         |         |
| LYM<br>[10 <sup>3</sup> /mm <sup>3</sup> ] | After 7 days  | Mean±SD        | 1.91±0.77                       | 1.74±0.82                         | 2.28±0.6                       | 2.25±0.65                        | 0.047   | 0.68    | 0.0007  | 0.0001  |
|                                            |               | Median (Range) | 1.73 (0.6-4.99)                 | 1.63 (0.2-4.58)                   | 2.11 (1.26-3.67)               | 2.11 (1.31-3.88)                 |         |         |         |         |
|                                            | After 30 days | Mean±SD        | 1.93±0.79                       | 1.30±0.67                         | 2.19±0.61                      | 2.37±0.66                        | <0.0001 | 0.33    | 0.012   | <0.0001 |
|                                            |               | Median (Range) | 1.76 (0.55-5.21)                | 1.17 (0.11-3.11)                  | 2.03 (1.17-3.52)               | 2.23 (1.41-4.05)                 |         |         |         |         |
| MON<br>[10 <sup>3</sup> /mm <sup>3</sup> ] | After 7 days  | Mean±SD        | 0.76±0.32                       | 0.79±0.35                         | 0.50±0.14                      | 0.48±0.16                        | 0.47    | 0.33    | <0.0001 | <0.0001 |
|                                            |               | Median (Range) | 0.72 (0.22-1.64)                | 0.75 (0.22-2.62)                  | 0.52 (0.25-0.72)               | 0.46 (0.22-1.06)                 |         |         |         |         |
|                                            | After 30 days | Mean±SD        | 0.70±0.39                       | 0.69±0.34                         | 0.53±0.14                      | 0.41±0.16                        | 0.56    | 0.0008  | 0.097   | <0.0001 |
|                                            |               | Median (Range) | 0.59 (0.07-2.08)                | 0.66 (0.08-2.39)                  | 0.55 (0.28-0.75)               | 0.39 (0.15-0.99)                 |         |         |         |         |
| NEU<br>[10 <sup>3</sup> /mm <sup>3</sup> ] | After 7 days  | Mean±SD        | 6.41±2.43                       | 6.69±3.64                         | 3.72±1.34                      | 3.65±1.09                        | 0.73    | 0.87    | <0.0001 | <0.0001 |
|                                            |               | Median (Range) | 6.08 (1.09-14.11)               | 5.64 (1.44-23.8)                  | 3.58 (1.7-8.55)                | 3.51 (1.98-7.23)                 |         |         |         |         |
|                                            | After 30 days | Mean±SD        | 6.28±3.33                       | 5.74±2.68                         | 3.56±1.37                      | 3.76±1.09                        | 0.90    | 0.56    | <0.0001 | <0.0001 |
|                                            |               | Median (Range) | 5.66 (0.35-21.4)                | 5.15 (0.91-16.1)                  | 3.53 (1.37-8.22)               | 3.62 (2.09-7.34)                 |         |         |         |         |
| EOS<br>[10 <sup>3</sup> /mm <sup>3</sup> ] | After 7 days  | Mean±SD        | 0.20±0.17                       | 0.19±0.15                         | 0.23±0.15                      | 0.23±0.16                        | 0.92    | 0.89    | 0.096   | 0.12    |
|                                            |               | Median (Range) | 0.16 (0.01-1.02)                | 0.16 (0.0-0.87)                   | 0.17 (0.05-0.77)               | 0.19 (0.03-0.82)                 |         |         |         |         |
|                                            | After 30 days | Mean±SD        | 0.16±0.2                        | 0.90±8.6                          | 0.21±0.15                      | 0.29±0.16                        | 0.67    | 0.0052  | 0.0034  | <0.0001 |
|                                            |               | Median (Range) | 0.10 (0.0-1.89)                 | 0.13 (0.0-101.0)                  | 0.17 (0.04-0.73)               | 0.25 (0.09-0.88)                 |         |         |         |         |
| RBC<br>[10 <sup>6</sup> /mm <sup>3</sup> ] | After 7 days  | Mean±SD        | 4.86±0.49                       | 4.45±0.58                         | 4.63±0.41                      | 4.9±0.42                         | <0.0001 | 0.0058  | 0.008   | <0.0001 |
|                                            |               | Median (Range) | 4.83 (3.56-6.26)                | 4.49 (3.1-5.93)                   | 4.67 (3.19-5.29)               | 4.92 (3.98-5.62)                 |         |         |         |         |
|                                            | After 30 days | Mean±SD        | 4.30±0.47                       | 4.31±0.59                         | 4.72±0.41                      | 5.05±0.42                        | 0.85    | 0.0014  | <0.0001 | <0.0001 |
|                                            |               | Median (Range) | 4.28 (3.09-5.79)                | 4.33 (3.09-5.67)                  | 4.76 (3.28-5.38)               | 5.06 (4.12-5.76)                 |         |         |         |         |
| HGB<br>[g/dL]                              | After 7 days  | Mean±SD        | 13.93±1.63                      | 11.55±2.27                        | 14.37±1.27                     | 14.28±1.26                       | <0.0001 | 0.76    | 0.11    | <0.0001 |
|                                            |               | Median (Range) | 14.13 (9.7-17.93)               | 11.51 (5.31-17.2)                 | 14.44 (11.04-16.54)            | 14.36 (11.76-16.56)              |         |         |         |         |
|                                            | After 30 days | Mean±SD        | 11.42±1.83                      | 10.24±2.29                        | 14.49±1.13                     | 14.4±1.26                        | <0.0001 | 0.70    | <0.0001 | <0.0001 |
|                                            |               | Median (Range) | 11.65 (6.35-15.35)              | 9.99 (5.14-16.39)                 | 14.6 (11.35-16.2)              | 14.48 (11.88-16.68)              |         |         |         |         |
| HCT [%]                                    | After 7 days  | Mean±SD        | 40.69±4.02                      | 38.29±5.47                        | 42.89±3.77                     | 40.43±3.16                       | <0.0001 | 0.0034  | 0.0037  | 0.0099  |
|                                            |               | Median (Range) | 41.01 (29.61-50.15)             | 38.59 (23.34-57.14)               | 43.13 (31.53-49.73)            | 40.95 (33.15-44.95)              |         |         |         |         |
|                                            |               | Mean±SD        | 36.87±4.85                      | 37.12±6.13                        | 42.97±3.44                     | 39.07±3.16                       | 0.56    | <0.0001 | <0.0001 | 0.089   |

|            |               |                |                     |                     |                  |                     |         |       |         |         |
|------------|---------------|----------------|---------------------|---------------------|------------------|---------------------|---------|-------|---------|---------|
|            | After 30 days | Median (Range) | 37.85 (22.34-46.34) | 37.3 (20.19-56.11)  | 43.6 (32.9-48.4) | 39.59 (31.79-43.59) |         |       |         |         |
| CRP [mg/L] | After 7 days  | Mean±SD        | 26.72±14.16         | 32.71±18.02         | 2.74±1.94        | 1.97±2.51           | 0.006   | 0.014 | <0.0001 | <0.0001 |
|            |               | Median (Range) | 26.15 (0.2-76.95)   | 31.62 (4.34-90.6)   | 2.31 (0.62-8.32) | 1.08 (0.73-14.53)   |         |       |         |         |
|            | After 30 days | Mean±SD        | 24.89±16.53         | 48.14±22.56         | 2.50±1.94        | 2.03±2.51           | <0.0001 | 0.13  | <0.0001 | <0.0001 |
|            |               | Median (Range) | 21.9 (0.84-84.22)   | 44.74 (7.06-114.79) | 2.07 (0.38-8.08) | 1.14 (0.74-14.63)   |         |       |         |         |

\* statistically significant result

**Table S2.** Analysis of selected parameters of peripheral blood and CRP levels in NSCLC patients divided regarding stage of the disease in 7 and 30 days after receiving the PCV13 vaccine in relation to unvaccinated patients.

|                                         |               |                | NSCLC group (0-II stages) (n=103) |                               | NSCLC group (III-IV stages) (n=182) |                               | p-value |         |         |         |
|-----------------------------------------|---------------|----------------|-----------------------------------|-------------------------------|-------------------------------------|-------------------------------|---------|---------|---------|---------|
|                                         |               |                | Vaccinated (group 1) (n=67)       | Unvaccinated (group 2) (n=36) | Vaccinated (group 3) (n=83)         | Unvaccinated (group 4) (n=99) | 1 vs. 2 | 3 vs. 4 | 1 vs. 3 | 2 vs. 4 |
| WBC [10 <sup>3</sup> /mm <sup>3</sup> ] | After 7 days  | Mean±SD        | 9.60±2.64                         | 8.98±2.88                     | 10.11±2.9                           | 10.06±3.05                    | 0.2     | 0.71    | 0.21    | 0.063   |
|                                         |               | Median (Range) | 9.0 (5.4-22.07)                   | 9.25 (4.39-17.91)             | 10.1 (3.9-16.2)                     | 9.5 (4.4-17.9)                |         |         |         |         |
|                                         | After 30 days | Mean±SD        | 9.5±2.8                           | 8.85±2.17                     | 8.2±3.7                             | 9.49±3.20                     | 0.23    | 0.02    | 0.026   | 0.41    |
|                                         |               | Median (Range) | 9.02 (4.3-22.19)                  | 8.69 (4.23-16.44)             | 8.2 (0.2-16.7)                      | 9.1 (3.7-17.5)                |         |         |         |         |
| LYM [10 <sup>3</sup> /mm <sup>3</sup> ] | After 7 days  | Mean±SD        | 1.94±0.78                         | 1.96±0.92                     | 1.88±0.8                            | 1.67±0.77                     | 0.64    | 0.09    | 0.68    | 0.21    |
|                                         |               | Median (Range) | 1.70 (0.9-4.99)                   | 1.50 (0.45-3.87)              | 1.7 (0.6-4.7)                       | 1.6 (0.2-4.6)                 |         |         |         |         |
|                                         | After 30 days | Mean±SD        | 2.1±0.8                           | 1.39±0.69                     | 1.8±0.8                             | 1.27±0.66                     | <0.0001 | <0.0001 | 0.007   | 0.56    |
|                                         |               | Median (Range) | 1.86 (1.1-5.21)                   | 1.07 (0.11-2.63)              | 1.6 (0.6-4.75)                      | 1.2 (0.2-3.1)                 |         |         |         |         |
| MON [10 <sup>3</sup> /mm <sup>3</sup> ] | After 7 days  | Mean±SD        | 0.69±0.3                          | 0.77±0.49                     | 0.82±0.33                           | 0.80±0.29                     | 0.57    | 0.90    | 0.012   | 0.075   |
|                                         |               | Median (Range) | 0.64 (0.22-1.62)                  | 0.65 (0.22-2.62)              | 0.78 (0.3-1.6)                      | 0.77 (0.3-1.9)                |         |         |         |         |
|                                         | After 30 days | Mean±SD        | 0.55±0.3                          | 0.60±0.49                     | 0.82±0.42                           | 0.72±0.26                     | 0.91    | 0.40    | <0.0001 | 0.0004  |
|                                         |               | Median (Range) | 0.50 (0.07-1.5)                   | 0.53 (0.09-2.39)              | 0.72 (0.08-2.1)                     | 0.73 (0.1-1.3)                |         |         |         |         |
| NEU [10 <sup>3</sup> /mm <sup>3</sup> ] | After 7 days  | Mean±SD        | 6.18±2.2                          | 6.58±3.2                      | 6.62±2.6                            | 6.79±3.8                      | 0.83    | 0.47    | 0.33    | 0.88    |
|                                         |               | Median (Range) | 5.85 (2.62-14.11)                 | 5.38 (2.34-16.11)             | 6.2 (1.1-12.3)                      | 5.97 (1.4-23.8)               |         |         |         |         |
|                                         | After 30 days | Mean±SD        | 5.72±2.4                          | 5.99±2.77                     | 6.75±3.9                            | 5.70±2.7                      | 0.69    | 0.17    | 0.28    | 0.65    |
|                                         |               | Median (Range) | 5.6 (1.82-13.9)                   | 5.15 (1.81-15.8)              | 5.73 (0.35-21.4)                    | 5.2 (0.9-16.1)                |         |         |         |         |
|                                         |               | Mean±SD        | 0.20±0.19                         | 0.16±0.09                     | 0.20±0.16                           | 0.20±0.17                     | 0.99    | 0.77    | 0.47    | 0.52    |

|                                            |                  |                   |                     |                     |                  |                    |         |         |         |         |
|--------------------------------------------|------------------|-------------------|---------------------|---------------------|------------------|--------------------|---------|---------|---------|---------|
| EOS<br>[10 <sup>3</sup> /mm <sup>3</sup> ] | After 7<br>days  | Median<br>(Range) | 0.15 (0.01-1.02)    | 0.15 (0.02-0.37)    | 0.16 (0.03-0.71) | 0.17 (0.0-0.9)0.93 |         |         |         |         |
|                                            | After 30<br>days | Mean±SD           | 0.18±0.26           | 0.19±0.23           | 0.15±0.13        | 1.17±10.1          | 0.11    | 0.72    | 0.93    | 0.068   |
|                                            |                  | Median<br>(Range) | 0.10 (0.0-1.89)     | 0.14 (0.03-1.42)    | 0.11 (0.0-0.56)  | 0.1 (0.0-101.0)    |         |         |         |         |
| RBC<br>[10 <sup>6</sup> /mm <sup>3</sup> ] | After 7<br>days  | Mean±SD           | 4.90±0.48           | 4.69±0.5            | 4.82±0.5         | 4.36±0.58          | 0.04    | <0.0001 | 0.35    | 0.002   |
|                                            |                  | Median<br>(Range) | 4.93 (3.56-5.96)    | 4.71 (3.8-5.76)     | 4.78 (3.6-6.26)  | 4.4 (3.1-5.9)      |         |         |         |         |
|                                            | After 30<br>days | Mean±SD           | 4.37±0.41           | 4.53±0.50           | 4.24±0.51        | 4.23±0.61          | 0.07    | 0.84    | 0.084   | 0.007   |
|                                            |                  | Median<br>(Range) | 4.37 (3.45-5.32)    | 4.62 (3.6-5.5)      | 4.23 (3.1-5.8)   | 4.2 (3.1-5.7)      |         |         |         |         |
| HGB<br>[g/dL]                              | After 7<br>days  | Mean±SD           | 14.51±1.42          | 12.86±1.9           | 13.48±1.7        | 11.05±2.21         | <0.0001 | <0.0001 | <0.0001 | <0.0001 |
|                                            |                  | Median<br>(Range) | 14.43 (10.43-17.93) | 12.8 (8.9-15.9)     | 13.7 (9.7-17.7)  | 11.1 (5.3-17.2)    |         |         |         |         |
|                                            | After 30<br>days | Mean±SD           | 12.41±1.4           | 11.68±2.2           | 10.65±1.8        | 9.71±2.11          | 0.11    | 0.0001  | <0.0001 | <0.0001 |
|                                            |                  | Median<br>(Range) | 12.5 (8.25-15.2)    | 11.6 (6.8-15.1)     | 10.9 (6.4-15.4)  | 9.6 (5.1-16.4)     |         |         |         |         |
| HCT [%]                                    | After 7<br>days  | Mean±SD           | 41.28±3.9           | 39.6±6.0            | 40.25±4.1        | 37.73±5.22         | 0.13    | <0.0001 | 0.23    | 0.056   |
|                                            |                  | Median<br>(Range) | 41.45 (30.15-50.15) | 39.99 (23.34-57.14) | 40.8 (29.6-47.6) | 38.1 (24.8-57.0)   |         |         |         |         |
|                                            | After 30<br>days | Mean±SD           | 38.18±3.96          | 39.4±6.1            | 35.8±5.3         | 36.30±6.02         | 0.075   | 0.58    | 0.006   | 0.003   |
|                                            |                  | Median<br>(Range) | 38.6 (25.47-44.4)   | 40.2 (22.3-56.11)   | 36.3 (22.3-46.3) | 36.9 (20.2-56.0)   |         |         |         |         |
| CRP<br>[mg/L]                              | After 7<br>days  | Mean±SD           | 24.0±15.8           | 27.4±13.4           | 29.10±12.24      | 34.77±19.2         | 0.15    | 0.09    | 0.006   | 0.12    |
|                                            |                  | Median<br>(Range) | 21.77 (0.2-76.95)   | 26.1 (4.9-52.0)     | 26.7 (7.0-67.3)  | 31.9 (4.3-90.6)    |         |         |         |         |
|                                            | After 30<br>days | Mean±SD           | 19.2±15.3           | 35.2±16.65          | 29.45±16.3       | 52.82±22.85        | <0.0001 | <0.0001 | <0.0001 | <0.0001 |
|                                            |                  | Median<br>(Range) | 17.0 (0.84-72.7)    | 33.7 (7.06-74.7)    | 25.7 (9.5-84.2)  | 50.4 (12.7-114.8)  |         |         |         |         |
